# Supplementary material
Source: publisher figshare collection journal article supplement (https://gsajournals.figshare.com/ndownloader/files/13192277)
Supplement: Supplementary file 1 [file 13192277]

| 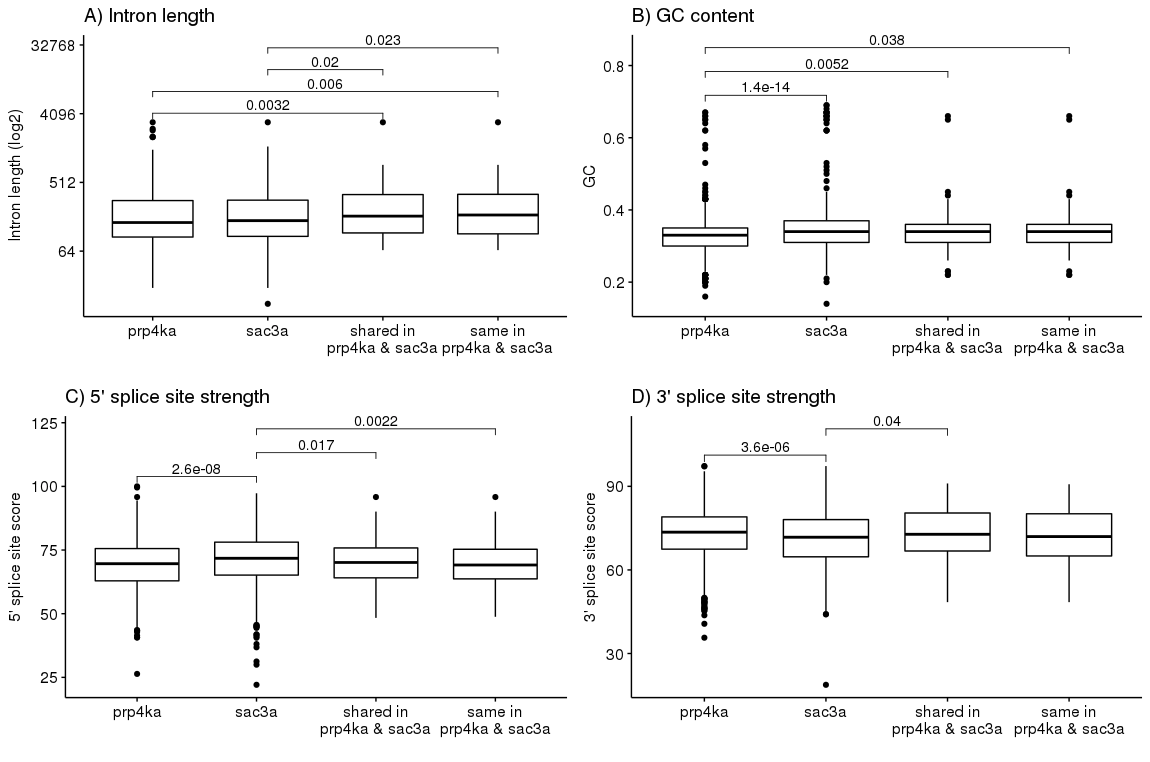 |
| --- |
| **Figure S8: Analysis of alternative introns differentially regulated in both *prp4ka* and *sac3a* mutants.** The intron length, guanine-cytosine (GC) content, and the 5’ and 3’ splice site scores of the alternative introns of *prp4ka*, *sac3a*, and of the events regulated in both mutants (shared and same) were compared. The “shared”-subgroup describes the evens regulated In both mutants and the “same”-subgroup describes the event regulated in the same manner in both mutants. |
